# Supplementary material
Source: MDPI journal article supplement (https://www.mdpi.com/2072-4292/15/14/3466)
Supplement: s1 [file s1]

Archive with 3 entries (3 files):
- remotesensing-2459521-supplementary materials Figures.pdf
- remotesensing-2459521-supplementary materials Tables.pdf
- remotesensing-2459521-supplementary materials Texts.pdf
